# The American Journal of Psychiatry

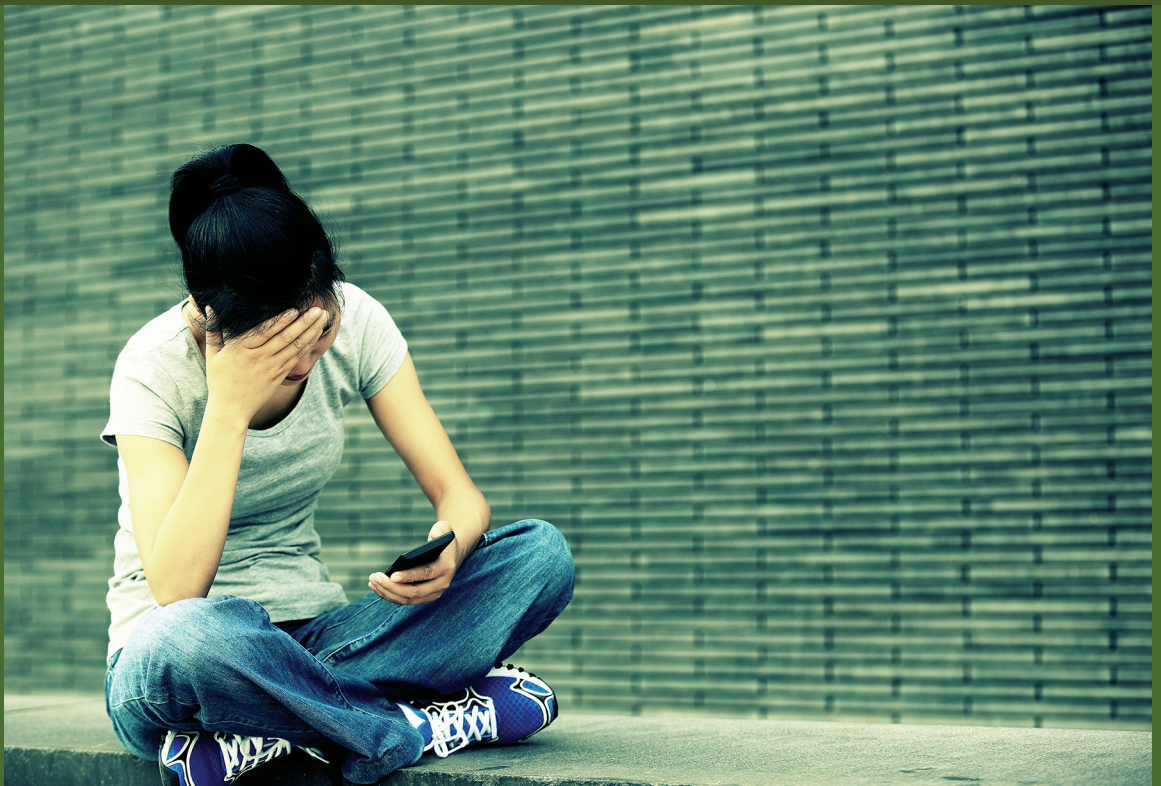

Smartphones for Smarter Care? Self-Management in Schizophrenia

Randomized Clinical Trial of Real-Time fMRI Amygdala  
Neurofeedback for Major Depressive Disorder

A Randomized, Controlled Trial of Medication and  
Cognitive-Behavioral Therapy for Hypochondriasis

Suicide Following Deliberate Self-Harm
