## PERSPECTIVAS

### EDITORIALES

- 717 Neuro-retroalimentación guiada por la amígdala para la depresión mayor**  
*Leanne M. Williams, Ph.D.*
- 719 Nuevos enfoques en el tratamiento de la hipocondría**  
*Katharine A. Phillips, M.D.*
- 721 Sacar las armas de fuego de la casa después de un intento de suicidio puede salvar vidas**  
*Merete Nordentoft, Dr.Med., Ph.D., et al.*
- 723 Tratamiento de los trastornos de ansiedad en los jóvenes: Se llena más la taza**  
*Neal D. Ryan, M.D.*

### CONFERENCIA DE CASO CLÍNICO

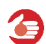

- 725 ¿Teléfonos inteligentes para una atención más inteligente? Automanejo en esquizofrenia**  
*Luis R. Sandoval, Ph.D., et al.* **EMC • AUDIO • GUÍAS CLÍNICAS**

### IMÁGENES EN PSIQUIATRÍA

- 729 Thomas Verner Moore (1877–1969)**  
*Richard Noll, Ph.D., et al.*

### DISCURSO PRESIDENCIAL DE LA APA

- 731 Discurso presidencial [Health Policy, Advocacy, and Public Education]**  
*Maria A. Oquendo, M.D., Ph.D.*
- 734 Respuesta al Discurso presidencial**  
*Anita Everett, M.D., DFAPA*
- 737 Maria A. Oquendo, M.D., Ph.D., 143ª Presidenta, 2016–2017**  
*Melissa R. Arbuckle, M.D., Ph.D.*

### REVISIÓN Y RESEÑAS

- 738 El papel de las intervenciones comportamentales en el tratamiento de mantenimiento con buprenorfina: Una revisión**  
*Kathleen M. Carroll, Ph.D., Roger D. Weiss, M.D.* **AUDIO • GUÍAS CLÍNICAS**

## NUEVAS INVESTIGACIONES

### ARTÍCULOS

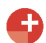

- 748 Ensayo clínico aleatorizado de neuro-retroalimentación de la amígdala con IRMf en tiempo real para el trastorno de depresión mayor: Efectos en los síntomas y recuperación de la memoria autobiográfica**  
*Kymerly D. Young, Ph.D., et al.* **EDITORIAL • EMC • AUDIO • VIDEO**
- 756 Un ensayo controlado, aleatorizado de medicación y terapia cognitivo-conductual para la hipocondría**  
*Brian A. Fallon, M.D., et al.* **EDITORIAL • AUDIO • VIDEO • GUÍAS CLÍNICAS**
- 765 Suicidio después de autolesión deliberada**  
*Mark Olfson, M.D., M.P.H., et al.* **EDITORIAL • EMC • AUDIO • GUÍAS CLÍNICAS**

- 775** Características complementarias de la terapia de modificación del sesgo de atención y la terapia cognitivo-conductual en trastornos de ansiedad en niños  
*Lauren K. White, Ph.D., et al.* EDITORIAL • AUDIO • GUÍAS CLÍNICAS
- 785** Estrés psicosocial y función cerebral en psicopatología adolescente  
*Erin Burke Quinlan, Ph.D., et al.*
- 795** Conducta suicida durante el tratamiento con litio y valproato: Un estudio prospectivo intrasujeto de 8 años de 5.000 pacientes con trastorno bipolar  
*Jie Song, Ph.D., et al.* AUDIO • GUÍAS CLÍNICAS

## COMUNICADOS Y ACTUALIZACIONES

### CARTAS AL EDITOR

- 803** Los Cambios a los criterios diagnósticos para trastorno bipolar en el DSM-5 casi no afectan el diagnóstico de por vida: Hallazgos del estudio de la Red de Investigación en Trastorno Bipolar del Reino Unido (BDRN)  
*Katherine Gordon-Smith, Ph.D., et al.*
- 803** Comentario sobre el riesgo de manía emergente por el tratamiento con metilfenidato en trastorno bipolar  
*Terence A. Ketter, M.D., Bernardo Dell’Osso, M.D.*
- 804** Necesidad de más investigación de los efectos de la medicación en trastorno bipolar: Respuesta a Ketter y Dell’Osso  
*Mikael Landén, M.D., Ph.D., Alexander Viktorin, Ph.D.*

### RESEÑAS BIBLIOGRÁFICAS

- 806** Psychiatric Neurotherapeutics: Contemporary Surgical and Device-Based Treatments [Neuroterapéutica psiquiátrica: Tratamientos contemporáneos basados en dispositivos y quirúrgicos]  
*Scott T. Aaronson, M.D.*

### ACTOS OFICIALES

- 807** Reporte anual de 2016 de la Junta Norteamericana de Psiquiatría y Neurología, Inc.

## OTROS TEMAS DE INTERÉS

- 805** Correction
- 817** Educación Médica Continuada

**Cubierta:** [This issue’s Clinical Case Conference by Sandoval et al. (p. 725) discusses how a patient turned to smartphone apps to help fill perceived gaps in his treatment with regard to social and emotional skills. [Image by lzf, shutterstock.com.]

Article content that addresses **Core Competencies**, defined by the Accreditation Council of Graduate Medical Education and the American Board of Medical Specialties, is indicated by the following symbols:

- |                                                                                                                            |                                                                                                                             |
|----------------------------------------------------------------------------------------------------------------------------|-----------------------------------------------------------------------------------------------------------------------------|
|  Professionalism                        |  Patient Care and Procedural Skills      |
|  Medical Knowledge                      |  Practice-Based Learning and Improvement |
|  Interpersonal and Communication Skills |  Systems-Based Practice.                 |

More information is available at [www.abms.org/board-certification/a-trusted-credential/based-on-core-competencies/](http://www.abms.org/board-certification/a-trusted-credential/based-on-core-competencies/)

- AUDIO** Highlighted in AJP Audio, a downloadable .mp3 file available at [ajp.psychiatryonline.org](http://ajp.psychiatryonline.org)
- EMC** A course covering the content of this article is available online for paid subscribers to the AJP EMC Course program
- EDITORIAL** Discussed in one of the issue’s editorials
- GUÍAS CLÍNICAS** Guías clínicas provided on the English table of contents
- VIDEO** Highlighted online by Deputy Editor Daniel S. Pine, M.D.

### La Tabla de Contenidos y resúmenes de Este Número Está Disponible en Español

(This issue’s Table of Contents and abstracts are available in Spanish)

Translation presented in collaboration with the Office of Global Health, Rutgers-Robert Wood Johnson Medical School

Support for this effort provided by ACTA Colombia.

#### Translation courtesy of

**Sergi Casals, M.A.**, Garuna, Medellín, Colombia ([www.garunaeditors.com](http://www.garunaeditors.com))

**Carlos Lopez Jaramillo, M.D.**, Universidad de Antioquia, Medellín, Colombia

**Javier I. Escobar, M.D., M.Sc.**, Rutgers-Robert Wood Johnson Medical School

# El papel de las intervenciones comportamentales en el tratamiento de mantenimiento con buprenorfina: Una revisión

Kathleen M. Carroll, Ph.D., Roger D. Weiss, M.D.

**Objetivo:** Aunque el *counseling* (orientación) es un requisito del tratamiento que se lleva a cabo en el consultorio con buprenorfina para los trastornos de consumo de opiáceos, la naturaleza de lo que constituye un *counseling* adecuado no está clara y es controvertida. Los autores revisan la literatura sobre el papel, la naturaleza y la intensidad de las intervenciones comportamentales en el tratamiento con buprenorfina que se lleva a cabo en el consultorio.

**Método:** Los autores hicieron una revisión de estudios controlados aleatorizados que evalúan la eficacia de añadir una intervención comportamental al tratamiento de mantenimiento con buprenorfina.

**Resultados:** Cuatro estudios clave no mostraron ningún beneficio de añadir una intervención comportamental a la buprenorfina más gestión médica, y cuatro estudios indicaron algún beneficio para intervenciones comportamentales específicas, principalmente el tratamiento de contingencia. Los autores examinaron los hallazgos de los ensayos negativos en el contexto de seis preguntas: 1) ¿La buprenorfina sí es tan efectiva? 2) ¿La gestión médica sí es tan efectiva? 3) ¿Las intervenciones comportamentales en esta población sí

son tan efectivas? 4) ¿Cómo ha afectado el diseño de investigación los resultados de los estudios de buprenorfina más tratamiento comportamental? 5) ¿Qué sabemos de subgrupos de pacientes que se benefician de las intervenciones comportamentales y de los que aparentemente no se benefician de ellas? 6) ¿Cuál debe ser el objetivo de los clínicos en cuanto al resultado del tratamiento de mantenimiento con buprenorfina?

**Conclusiones:** La gestión médica de alta calidad puede ser suficiente para algunos pacientes, pero existen pocos datos sobre los tipos de individuos para los que la gestión médica es suficiente. Los médicos deben considerar un modelo de atención escalonado en el que los pacientes puedan empezar con un tratamiento relativamente poco intenso, con más intensidad para los pacientes que desde temprano experimentan dificultades en el tratamiento. Finalmente, con tasas de retención de 6 meses que exceden el 50% y resultados pobres después de la deserción, debemos explorar estrategias innovadoras para potenciar la retención en el tratamiento con buprenorfina.

(*Am J Psychiatry* 2017; 174:738–747)

## Ensayo clínico aleatorizado de neuro-retroalimentación de la amígdala con IRMf en tiempo real para el trastorno de depresión mayor: Efectos en los síntomas y recuperación de la memoria autobiográfica

Kymberly D. Young, Ph.D., Greg J. Siegle, Ph.D., Vadim Zotev, Ph.D., Raquel Phillips, B.S., Masaya Misaki, Ph.D., Han Yuan, Ph.D., Wayne C. Drevets, M.D., Jerzy Bodurka, Ph.D.

**Objetivo:** Los pacientes con depresión muestran actividad hemodinámica menguada de la amígdala como respuesta a estímulos positivos, incluyendo recuerdos autobiográficos. Los autores examinaron la eficacia terapéutica del entrenamiento en retro-alimentación con IRM funcional en tiempo real (rtfMRI-nf, por sus siglas en inglés) con el objetivo de aumentar la respuesta hemodinámica de la amígdala a recuerdos positivos en pacientes con depresión.

**Método:** En un ensayo clínico aleatorizado, controlado con placebo y doble ciego, adultos con depresión no medicados (N=36) fueron asignados aleatoriamente para recibir dos sesiones de rtfMRI-nf o bien de la amígdala (N=19), o bien de una región de control parietal no involucrada en el procesamiento emocional (N=17). Se evaluaron las puntuaciones clínicas y el desempeño de la memoria autobiográfica al inicio del estudio y 1 semana después de la sesión final de rtfMRI-nf. La medida primaria de resultados fue el cambio en la puntuación de la Escala de Montgomery-Åsberg para la Evaluación de la Depresión (MADRS) y el principal enfoque analítico consistía en un análisis de modelos lineales mixtos.

**Resultados:** En los participantes del grupo experimental, la

respuesta hemodinámica en la amígdala aumentó en relación a su propia respuesta al inicio del estudio y al grupo control. Doce participantes en el grupo de rtfMRI-nf de la amígdala, en comparación con solamente dos en el grupo control, tuvieron una disminución de >50% en la puntuación de la escala MADRS. Seis participantes en el grupo experimental, en comparación con uno en el grupo control, cumplieron los criterios convencionales de remisión al final del estudio, dando como resultado un número necesario a tratar de 4. En los participantes que recibieron rtfMRI-nf de la amígdala, el porcentaje de recuerdos positivos específicos recuperados aumentó en relación al inicio del estudio y al grupo control.

**Conclusiones:** El entrenamiento en rtfMRI-nf para aumentar la respuesta hemodinámica de la amígdala a recuerdos positivos redujo significativamente los síntomas depresivos y aumentó el porcentaje de recuerdos específicos recuperados en una prueba de memoria autobiográfica. Estos datos confirman un papel de la amígdala en la recuperación de la depresión.

(*Am J Psychiatry* 2017; 174:748–755)

## Un ensayo controlado aleatorizado de medicación y terapia cognitivo-conductual para la hipocondría

Brian A. Fallon, M.D., David K. Ahern, Ph.D., Martina Pavlicova, Ph.D., Iordan Slavov, Ph.D., Natalia Skritskya, Ph.D., Arthur J. Barsky, M.D.

**Objetivo:** Estudios anteriores sobre la hipocondría demostraron que la farmacoterapia y la terapia cognitivo-conductual (TCC) son beneficiosas. Este estudio examina si el tratamiento conjunto ofrece beneficios adicionales.

**Método:** Pacientes con hipocondría según el diagnóstico del DSM-IV (N=195) fueron asignados aleatoriamente a uno de cuatro tratamientos: placebo, TCC, fluoxetina, o tratamiento conjunto con fluoxetina y TCC. Las evaluaciones examinaron la hipocondría, otra psicopatología, los eventos adversos, el estatus funcional y la calidad de vida. El análisis primario evaluó el resultado en la semana 24, en la muestra con intención de tratar, definiendo la respuesta al tratamiento como una mejora del 25% o mayor con respecto al inicio del estudio tanto en el Índice Whiteley como en una versión modificada de la Escala de Obsesión-Compulsión de Yale-Brown para hipocondría (H-YBOCS-M). La prueba de tendencias Cochran-Armitage evaluó el patrón de respuesta de la hipótesis: el tratamiento conjunto > TCC o tratamiento con fluoxetina > tratamiento placebo.

**Resultados:** El patrón de respuesta previsto fue significativo estadísticamente, como muestran las siguientes tasas de respuesta: grupo del tratamiento conjunto, 47,2%; grupo de

un único tratamiento activo, 41,8%; y grupo placebo, 29,6%. Las tasas de respuesta para cada uno de los tratamientos activos no difirieron significativamente de las tasas de respuesta para placebo. Análisis secundarios del Índice Whiteley como medida continua revelaron que, en comparación con el placebo, la fluoxetina (pero no la TCC) fue significativamente más efectiva en la semana 24 para reducir la hipocondría y tuvo una tasa de mejora significativamente más rápida en 24 semanas. La fluoxetina también tuvo como resultado una disminución significativa de la ansiedad y una mejora significativa de la calidad de vida con respecto al placebo. Las tasas de deserción no fueron significativamente diferentes entre los grupos, y los eventos adversos por causa del tratamiento tuvieron una distribución uniforme.

**Conclusiones:** Este estudio corrobora la seguridad, tolerancia y eficacia de la fluoxetina para la hipocondría. El tratamiento conjunto brindó un beneficio ligeramente superior. Dado que 50% de los pacientes no respondieron a los tratamientos del estudio, se requieren enfoques nuevos o más intensivos.

(*Am J Psychiatry* 2017; 174:756–764)

## Suicidio después de autolesión deliberada

Mark Olfson, M.D., M.P.H., Melanie Wall, Ph.D., Shuai Wang, Ph.D., Stephen Crystal, Ph.D., Tobias Gerhard, Ph.D., Carlos Blanco, M.D., Ph.D.

**Objetivo:** El objetivo de los autores fue identificar factores de riesgo de autolesión repetida y suicidio consumado en el curso del año siguiente en adultos con autolesión deliberada.

**Método:** Se hizo seguimiento hasta por 1 año a una cohorte nacional de adultos subvencionados por *Medicaid*, diagnosticados clínicamente con autolesión deliberada (N=61.297). Se determinó autolesión repetida por 1.000 años-persona y tasas de suicidio por 100.000 años-persona (basadas en información de causa de la muerte del Índice Nacional de Defunciones) Los cocientes de riesgo (*hazard ratios*) de autolesión repetida y suicidio se estimaron con modelos de riesgo proporcional de Cox.

**Resultados:** Durante los 12 meses después de autolesión no fatal, la tasa de autolesión repetida fue 263,2 por 1.000 años-persona y la tasa de suicidio consumado fue 439,1 por 100.000 años-persona, o 37,2 veces más alta que en una cohorte de la población general con las mismas características. El riesgo de suicidio fue más alto durante los eventos de autolesión iniciales que implicaban métodos violentos en comparación con métodos no violentos (cociente de ries-

go=7,5; IC 95%I=5,5–10,1), especialmente armas de fuego (cociente de riesgo=15,86; IC 95%=10,7–23,4; calculado con intoxicación como referencia), y en menor medida después de eventos de pacientes que recientemente habían recibido atención de salud mental ambulatoria (cociente de riesgo=1,6; IC 95%=1,2–2,0) En comparación con los pacientes de autolesión que usaron métodos no violentos, los que utilizaron métodos violentos tuvieron un riesgo de suicidio significativamente más alto durante los primeros 30 días después del evento inicial (cociente de riesgo=17,5; IC 95%=11,2–27,3), pero no durante los siguientes 335 días.

**Conclusiones:** Los adultos tratados por autolesión deliberada a menudo repiten la autolesión en el año siguiente. Los pacientes que utilizan un método violento para su autolesión inicial, especialmente armas de fuego, tienen un riesgo de suicidio excepcionalmente alto, sobretodo inmediatamente después del evento inicial, lo que resalta la importancia de una evaluación cuidadosa y un seguimiento cercano de este grupo.

(*Am J Psychiatry* 2017; 174:765–774)

# Características complementarias de la terapia de modificación del sesgo de atención y la terapia cognitivo-conductual en trastornos de ansiedad en niños

Lauren K. White, Ph.D., Stefanie Sequeira, B.S., Jennifer C. Britton, Ph.D., Melissa A. Brotman, Ph.D., Andrea L. Gold, Ph.D., Erin Berman, Ph.D., Kenneth Towbin, M.D., Rany Abend, Ph.D., Nathan A. Fox, Ph.D., Yair Bar-Haim, Ph.D., Ellen Leibenluft, M.D., Daniel S. Pine, M.D.

**Objetivo:** En el tratamiento de los trastornos de ansiedad, la terapia de modificación del sesgo de atención (ABMT, por sus siglas en inglés), puede tener efectos complementarios si se centran en diferentes aspectos de las respuestas a amenazas y los comportamientos alterados. La ABMT puede dirigirse a reacciones a amenazas implícitas y rápidas, mientras que la TCC puede dirigirse a respuestas a amenazas que se despliegan lentamente. Los autores utilizaron conectividad basada en la amígdala durante una tarea de atención a las amenazas y un diseño de ensayo controlado aleatorizado para evaluar las potenciales características complementarias de estos tratamientos en trastornos de ansiedad en niños.

**Método:** Antes del tratamiento, jóvenes (de entre 8 y 17 años) con trastornos de ansiedad (N=54) y jóvenes sanos de comparación (N=51) realizaron una tarea de atención a las amenazas durante la adquisición de IRM. Se evaluó la conectividad funcional basada en la amígdala relacionada con la tarea. Los pacientes con y sin imágenes de las resonancias (N=58) después fueron asignados aleatoriamente para recibir TCC juntamente con ABMT activa o ABMT placebo. Se evaluó la respuesta crítica y se compararon los perfiles de conectividad basada en la amígdala de los pacientes con diferentes niveles de respuesta clínica.

**Resultados:** En comparación con el grupo de TCC más ABMT placebo, el grupo de TCC más ABMT activa exhibió ansiedad menos grave después del tratamiento. Los grupos de pacientes y de sujetos sanos de comparación difirieron en la conectividad de la amígdala-insula durante la tarea de atención a las amenazas. Los pacientes cuyos perfiles de conectividad diferían más de los de los sujetos sanos del grupo de comparación mostraron la respuesta más pobre al tratamiento, en particular los que recibieron TCC más ABMT placebo.

**Conclusiones:** El estudio brinda evidencia de los efectos clínicos realizados para los pacientes que reciben ABMT activa. Además, la ABMT parece ser muy efectiva para los pacientes con conectividad amígdala-insula anómala. La ABMT puede apuntar a procesos específicos de amenazas asociados a la conectividad amígdala-insula disfuncional que no son el objetivo de la TCC cuando se usa sola. Esto puede explicar la observación de una mejor respuesta clínica a la TCC más ABMT activa.

(*Am J Psychiatry* 2017; 174:775–784)

## Estrés psicosocial y función cerebral en psicopatología adolescente

Erin Burke Quinlan, Ph.D., Anna Cattrell, Ph.D., Tianye Jia, Ph.D., Eric Artiges, M.D., Ph.D., Tobias Banaschewski, M.D., Ph.D., Gareth Barker, Ph.D., Arun L.W. Bokde, Ph.D., Uli Bromberg, Dipl.-Psych., Christian Büchel, M.D., Rüdiger Brühl, Ph.D., Patricia J. Conrod, Ph.D., Sylvane Desrivieres, Ph.D., Herta Flor, Ph.D., Vincent Frouin, Ph.D., Jürgen Gallinat, M.D., Hugh Garavan, Ph.D., Penny Gowland, Ph.D., Andreas Heinz, M.D., Ph.D., Jean-Luc Martinot, M.D., Ph.D., Marie-Laure Paillère Martinot, M.D., Ph.D., Frauke Nees, Ph.D., Dimitri Papadopoulos-Orfanos, Ph.D., Tomáš Paus, M.D., Ph.D., Luise Poustka, M.D., Michael N. Smolka, M.D., Nora C. Vetter, Ph.D., Henrik Walter, M.D., Ph.D., Robert Whelan, Ph.D., Jeffrey C. Glennon, Ph.D., Jan K. Buitelaar, M.D., Ph.D., Francesca Happé, Ph.D., Eva Loth, Ph.D., Edward D. Barker, Ph.D., Gunter Schumann, M.D., the IMAGEN Consortium

**Objetivo:** El objetivo de los autores fue explorar cómo los síntomas conductuales, de hiperactividad/inatención y emocionales están asociados con la reactividad neural a estímulos socio-emocionales, y hasta qué punto el estrés psicosocial modula estas relaciones.

**Método:** Los participantes fueron adolescentes de la comunidad, inscritos como participantes en el estudio europeo IMAGEN. Se utilizaron las regiones bilaterales de la amígdala que eran de interés para evaluar la relación entre los tres dominios de síntomas y la reactividad neural a IRM funcional durante la visualización pasiva de expresiones faciales dinámicas de enojo y neutrales. Se utilizó conectividad funcional exploratoria y enfoques de regresión múltiple del cerebro completo para analizar cómo los síntomas y el estrés psicosocial están relacionados con otras regiones cerebrales.

**Resultados:** Como respuesta a los estímulos socio-emocionales, los adolescentes con niveles altos de síntomas de la conducta o de hiperactividad/inatención que además ha-

bían experimentado un mayor número de eventos vitales estresantes mostraron hiperactividad de la amígdala y varias regiones del cerebro. Este efecto no se observó con los síntomas emocionales. Se encontró un *cluster* (grupo) en la corteza cingulada media que se podía observar tanto en los problemas de conducta como en los síntomas de hiperactividad. Los análisis de conectividad funcional exploratoria sugirieron que la conectividad amígdala-precúneo está asociada a los síntomas de hiperactividad/inatención.

**Conclusiones:** Los resultados relacionan las respuestas hiperactivas de la amígdala con las regiones críticas para el procesamiento de emociones descendiente (*top down*) en individuos con más síntomas de la conducta y de hiperactividad/inatención. Este trabajo pone de manifiesto la importancia de estudiar cómo el estrés psicosocial afecta las respuestas cerebrales funcionales a estímulos socio-emocionales, en particular en adolescentes con síntomas externalizantes.

(*Am J Psychiatry* 2017; 174:785–794)



# Conducta suicida durante el tratamiento con litio y valproato: Un estudio prospectivo intrasujeto de 8 años de 5.000 pacientes con trastorno bipolar

Jie Song, Ph.D., Arvid Sjölander, Ph.D., Erik Joas, M.S., Sarah E. Bergen, Ph.D., Bo Runeson, M.D., Ph.D., Henrik Larsson, Ph.D., Mikael Landén, M.D., Ph.D., Paul Lichtenstein, Ph.D.

**Objetivo:** Las conclusiones con respecto al efecto anti-suicida del litio para el trastorno bipolar han sido limitadas debido a sujetos no representativos y potenciales factores de confusión, incluyendo la variable gravedad de la enfermedad. Los hallazgos acerca del efecto del valproato, la alternativa más común al litio, son inconsistentes en relación al comportamiento suicida. Este estudio investigó la asociación de estos dos medicamentos con el riesgo de eventos relacionados con el suicidio y posibles diferencias entre los medicamentos, utilizando diseños intrasujeto en una cohorte longitudinal basada en registros.

**Método:** A través del enlace de múltiples registros nacionales suecos, se hizo seguimiento a 51.535 individuos con trastorno bipolar del 2005 al 2013 para tratamiento con litio y valproato. Se utilizó la regresión de Cox estratificada para estimar los cocientes de riesgo (*hazard ratios*) de eventos relacionados con el suicidio durante los períodos de tratamiento en comparación con los períodos sin tratamiento. Para las asociaciones significativas entre la medicación y los eventos relacionados con el suicidio, se estimó la fracción de población atribuible para evaluar el impacto de la salud pública para los pacientes con trastorno bipolar.

**Resultados:** Durante el seguimiento, se presentaron 10.648 eventos relacionados con el suicidio. La tasa de incidencia disminuyó significativamente un 14% durante el tratamiento con litio (cociente de riesgo 0,86; intervalo de confianza [IC] de 95% 0,78–0,95) pero no durante el tratamiento con valproato (cociente de riesgo 1,02; IC 95% 0,89–1,15). La diferencia en los cocientes de riesgo de eventos relacionados con el suicidio entre litio y valproato fue significativa estadísticamente. Las estimaciones de la fracción de población atribuible sugirieron que 12% (IC 95% 4%–20%) de los eventos relacionados con el suicidio se podrían haber evitado si los pacientes hubieran tomado litio durante todo el seguimiento.

**Conclusiones:** Los resultados sugieren que se debería considerar el litio para pacientes con trastorno bipolar con sospecha de intenciones suicidas. Aunque el riesgo de suicidio es solamente una de las consideraciones a la hora de ofrecer atención clínica.

(*Am J Psychiatry* 2017; 174:795–802)
