Civilian Corps

# Behavioral Health Careers

Army Medicine Civilian Corps is committed to care for military personnel, beneficiaries and their families at Army hospitals and clinics worldwide.

- » Exceptional Benefits
- » Patient Focused Care
- » Opportunities Worldwide
- » Rewarding Careers
- » Flexible Work Schedules
- » No Military Requirements

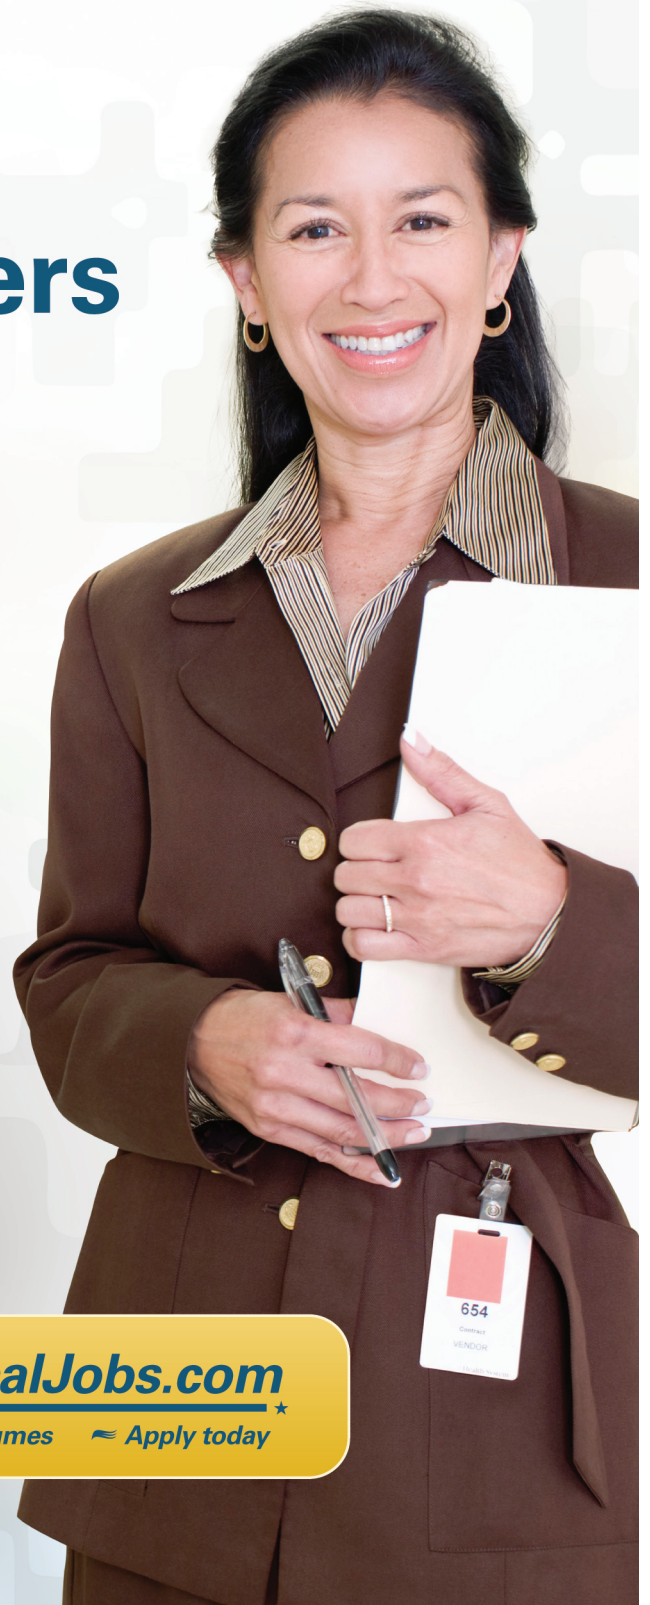

[CivilianMedicalJobs.com](http://CivilianMedicalJobs.com)

≈ Find Jobs ≈ Post Resumes ≈ Apply today

**civilian** CORPUS  
★ U.S. Army  
worldwide medical, behavioral health & dental careers

★ Vast Opportunities ★ Exceptional Benefits ★ Rewarding Careers

Army Medicine Civilian Corps employees are NOT subject to military requirements such as "boot camp," enlistments or deployments.

THE DEPARTMENT OF DEFENSE IS AN EQUAL OPPORTUNITY EMPLOYER.

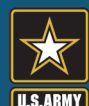

# Subscribe today to the highest ranked mental health journal in the Health Policy & Services category!\*

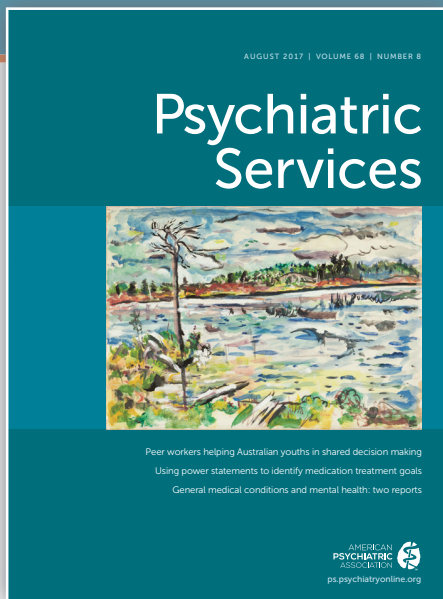

### Don't miss the August issue:

- Cervical cancer screening among women with severe mental illness
- Racial-ethnic differences in diabetes prevalence with use of antipsychotics
- Using power statements to enhance patient communication
- Youth mental health: how peer workers enhance consumer participation

### ▶ Coming in the September issue:

- RCT on targeted training in illness self-management of diabetes among persons with serious mental illness
- The costs of sustaining evidence-based practices in community mental health centers
- Child psychiatrist survey on monitoring SGA use: high awareness but low adoption of guidelines

### ▶ One low price covers your print and online subscription.

\$ 115 APA Member print and online subscription

\$ 105 APA Member online-only subscription

[ps.psychiatryonline.org](http://ps.psychiatryonline.org)

**Subscribe today at [www.appi.org](http://www.appi.org) or call  
Customer Service at 1-800-368-5777.**

\*By its most recent Impact Factor (2.888), *Psychiatric Services* is the highest ranked mental health services journal in the Health Policy & Services Category of ISI's Journal Citation Reports. Of the 77 peer-reviewed journals included in the Health Policy & Services Category, *Psychiatric Services* ranks 8th.

AMERICAN  
PSYCHIATRIC  
ASSOCIATION  
PUBLISHING   
[www.appi.org](http://www.appi.org)

# The Residents' JOURNAL

## The American Journal of Psychiatry Residents' Journal

July 2017

Volume 12

Issue 7

### Inside

- 2 Conceptualizing Psychiatric Disorders in a Historical Framework: The Twentieth and Twenty-First Centuries**  
Anna Kim, M.D.  
*Emphasizing the effects of war and terror on psychiatric health as manifested in numerous psychiatric consequences, such as PTSD, substance use, depression, and anxiety*
- 3 War and Children**  
Michelle Liu, M.D.  
*Examining the prevalence of mental disorders after conflict or childhood adverse experiences, as examined via risk and protective factors, and an overview of interventions*
- 6 The Role of Psychiatrists in the Growing Migrant and Refugee Crises**  
Nikhil "Sunny" A. Patel, M.D., M.P.H., M.S., Nina Sreshta, M.D.  
*Review of recent suspension of U.S. refugee programs, asylum evaluations and processes, and cultural competence*
- 9 Steering the Helm of Posttraumatic Stress Disorder Diagnosis and Treatment**  
Bruce Bassi, M.D., M.S.  
*Commentary on the history of the disorder, social context of diagnosis, DSM-5 criteria, and diversity in treatment approaches*
- 10 Unexpected Trauma**  
Samantha Swetter, M.D.  
*A resident's observation of returning veterans' emotional wounds and the dissonance between military and civilian cultures*
- 11 Baton Rouge: The Summer of Turmoil, a Test of Strength**  
Carline Nzodim, M.D.  
*A cultural frame of reference and narrative on a community's resilience in the face of racial tension, police brutality, gun violence, and a natural disaster*
- 12 Rewriting the Narrative With Logotherapy: Review of Man's Search for Meaning**  
Reviewed by Matthew LaCasse, D.O.
- 13 Residents' Resources**

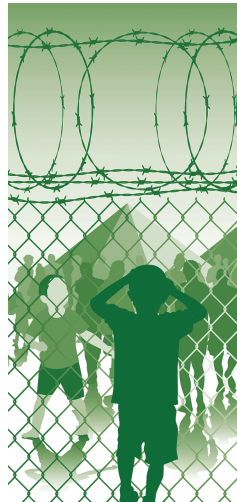

© Shutterstock.com, Route65

#### EDITOR-IN-CHIEF

Rachel Katz, M.D.

#### SENIOR DEPUTY EDITOR

Oliver Glass, M.D.

#### DEPUTY EDITOR

Anna Kim, M.D.

#### ASSOCIATE EDITORS

Erin Fulchiero, M.D.  
Helena Winston, M.D.

#### GUEST EDITOR

Anna Kim, M.D.

#### MEDIA EDITOR

Shawn E. McNeil, M.D.

#### CULTURE EDITOR

Michelle Liu, M.D.

#### STAFF EDITOR

Angela Moore

#### EDITORS EMERITI

Katherine Pier, M.D.

Rajiv Radhakrishnan, M.B.B.S., M.D.

Misty Richards, M.D., M.S.

Arshya Vahabzadeh, M.D.

Monifa Seawell, M.D.

Sarah M. Fayad, M.D.

Joseph M. Cerimele, M.D.

Molly McVoy, M.D.

Sarah B. Johnson, M.D.

**Editor-in-Chief**  
Rachel Katz, M.D.  
**Senior Deputy Editor**  
Oliver Glass, M.D.  
**Deputy Editor**  
Anna Kim, M.D.  
**Associate Editors**  
Erin Fulchiero, M.D.  
Helena Winston, M.D.

*The Residents' Journal*, the largest and most robust resident-led journal in the house of medicine, is an e-publication that serves as a forum to share your ideas and experiences in training, clinical practice, research, and careers with your colleagues.

To submit a manuscript, please visit [mc.manuscriptcentral.com/appi-ajp](http://mc.manuscriptcentral.com/appi-ajp) and select a manuscript type for AJP Residents' Journal. You may submit a commentary (500 words), book review (500 words), history of psychiatry (500 words), clinical case conference (1,250 words), review article (1,500 words), treatment in psychiatry article (1,500 words), research article (1,250 words), drug review (1,500 words), or letter to the editor (250 words).

*The Residents' Journal* is sent free-of-charge to all psychiatry residents. Anyone interested in being included on the distribution list should contact Angela Moore, *The Residents' Journal* staff editor at [ajp@psych.org](mailto:ajp@psych.org) with "Subscribe to Residents' Journal" in the subject line.

To access the complete Residents' Journal archives, visit [ajp.psychiatryonline.org/residents\\_journal](http://ajp.psychiatryonline.org/residents_journal)

# THE AMERICAN PSYCHIATRIC ASSOCIATION

1000 Wilson Blvd., Suite 1825, Arlington, VA 22209-3901  
(888) 357-7924 (toll-free inside the U.S. and Canada) / (703) 907-7300  
web site: [www.psychiatry.org](http://www.psychiatry.org) • e-mail: [apa@psych.org](mailto:apa@psych.org)

## Chairpersons of Councils, Committees, and Task Forces

### Standing Committees

|                             |                               |
|-----------------------------|-------------------------------|
| <b>Bylaws</b>               | Esperanza Diaz, M.D.          |
| <b>Elections</b>            | Barry K. Herman, M.D.         |
| <b>Ethics</b>               | Ezra Griffith, M.D.           |
| <b>Finance and Budget</b>   | Alan F. Schatzberg, M.D.      |
| <i>Audit</i>                | Bruce J. Schwartz, M.D.       |
| <i>Investment Oversight</i> | David Fassler, M.D.           |
| <b>Joint Reference</b>      | Altha J. Stewart, M.D.        |
| <b>Membership</b>           | Rahn K. Bailey, M.D.          |
| <b>Nominating</b>           | Maria A. Oquendo, M.D., Ph.D. |
| <b>Tellers</b>              | Jose Vito, M.D.               |

### Non-Standing Committee

|                             |                              |
|-----------------------------|------------------------------|
| <b>Conflict of Interest</b> | Philip R. Muskin, M.D., M.A. |
|-----------------------------|------------------------------|

### Councils

#### Council on Addiction Psychiatry

Andrew J. Saxon, M.D.

#### Council on Advocacy and Government Relations

Patrick S. Runnels, M.D.

*Advocacy and Litigation Funding*

Bhasker J. Dave, M.D.

#### Council on Children, Adolescents, and Their Families

Joseph V. Penn, M.D.

#### Council on Communications

Christopher A. (Drew) Ramsey, M.D.

#### Council on Geriatric Psychiatry

Robert P. Roca, M.D.

#### Council on Healthcare Systems and Financing

Harsh K. Trivedi, M.D.

*Integrated Care*

Lori E. Raney, M.D.

*Reimbursement for Psychiatric Care*

Laurence Miller, M.D.

*RBRVS, Codes and Reimbursement*

Gregory G. Harris, M.D.

*Telepsychiatry*

James H. Shore, M.D.

#### Council on International Psychiatry

Bernardo Ng, M.D.

#### Council on Medical Education and Lifelong Learning

Mark H. Rapaport, M.D.

*Scientific Program*

Linda Worley, M.D.

*Scientific Program—IPS*

Michael T. Compton, M.D., M.P.H.

*Vestermark Award Committee*

Lowell D. Tong, M.D.

#### Council on Minority Mental Health and Health Disparities

Christina V. Mangurian, M.D.

#### Council on Psychiatry and Law

Debra A. Pinals, M.D.

*Judicial Action*

Marvin S. Swartz, M.D.

#### Council on Psychosomatic Medicine (Consultation Liaison Psychiatry)

David F. Gitlin, M.D.

#### Council on Quality Care

Grayson Norquist, M.D.

*Mental Health Information Technology*

Brent Nelson, M.D.

*Performance Measures*

Karen Pierce, M.D.

*Practice Guidelines*

Michael J. Vergare, M.D.

#### Council on Research

Dwight L. Evans, M.D.

*Psychiatric Dimensions of Disasters*

Robert J. Ursano, M.D.

# Go Online

Visit [ajp.psychiatryonline.org](http://ajp.psychiatryonline.org) for these features!

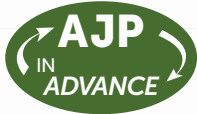

## AJP in Advance

*Discover the latest research advances before they appear in print*

### **Incomes and Outcomes: Social Security Disability Benefits in First-Episode Psychosis**

A 2-year multifaceted specialty care program for patients with first-episode psychosis did not significantly reduce the likelihood of receiving Social Security disability benefits. Patients who received disability benefits had increased total income and fewer days with alcohol intoxication but fewer days of employment and poorer motivation.

### **The Long-Term Effects of Antipsychotic Medication on Clinical Course in Schizophrenia**

The benefits of antipsychotic drugs in initial and maintenance treatment of schizophrenia are strongly supported by many randomized controlled trials. Clinical imaging studies and animal models have not established neurodegenerative effects of antipsychotics in human patients.

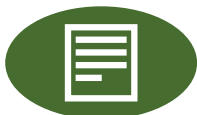

## AJP CME

*Earn CME credit: 3 courses per issue*

This month's courses appear on pages 817–820. Each short course is based on one article in this issue and can earn up to 1 *AMA PRA Category 1 Credit*<sup>™</sup>. CME credit is issued only **online**, and a paid subscription to AJP's CME course program is required.

Visit [psychiatryonline.org/cme](http://psychiatryonline.org/cme) and click on the "American Journal of Psychiatry" tab.

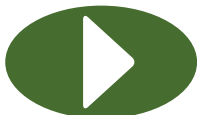

## AJP Multimedia

*Access Audio or Video for highlights of each issue*

In AJP Audio this month, Deputy Editor Susan K. Schultz, M.D., discusses smartphones for self-management in schizophrenia, behavioral interventions in buprenorphine maintenance treatment, suicide following self-harm, effects of lithium and valproate on suicidal behavior in bipolar disorder, treatment of pediatric anxiety disorders with cognitive-behavioral-therapy (CBT) plus attention bias modification therapy, treatment of hypochondriasis with CBT plus medication, and treatment of major depression with amygdala neurofeedback.

In this month's video, Deputy Editor Daniel S. Pine, M.D., discusses the articles "Randomized Clinical Trial of Real-Time fMRI Amygdala Neurofeedback for Major Depressive Disorder: Effects on Symptoms and Autobiographical Memory Recall" and "A Randomized Controlled Trial of Medication and Cognitive-Behavioral Therapy for Hypochondriasis."

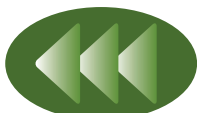

## History of Psychiatry

*Revisit the field's rich history through the pages of AJP*

### **25 years ago this month: "Psychodynamic Psychiatry in the 'Decade of the Brain'"**

Drawing on research on anxiety disorders, Dr. Glen O. Gabbard argues for a continued appreciation of "the complex relationships between psychosocial and neurophysiological factors in the etiology and pathogenesis of psychiatric disorders."

### **50 years ago this month: Changes in society and in psychiatry**

In 1967, society and medicine in the United States were both in flux, and commentaries in the August issue capture elements of each. In an essay entitled "The Old World and the New," Dr. Jurgen Ruesch contrasts the perspectives of the older and younger generations. In "A New Breed of Psychiatrist?" Dr. Daniel H. Funkenstein discusses the different types of students electing to train in psychiatry amid changes in medical practice and education.
