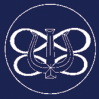

Official journal of the  
Japanese Society of Psychiatry and Neurology

# Psychiatry and Clinical Neurosciences

Volume 71  
Number 7  
July 2017

*Psychiatry and Clinical Neurosciences* (PCN) is the official English journal of the Japanese Society of Psychiatry and Neurology (JSPN), which has approximately 17,000 members.

PCN was founded as *Folia Psychiatrica et Neurologica Japonica* in 1922 and was renamed to *Japanese Journal of Psychiatry and Neurology* in 1986, then to PCN in 1995.

Current Editors-in-Chief are **Shigenobu Kanba** of Kyushu University and **Tadafumi Kato** of RIKEN Brain Science Institute. Guest Editor of the July 2017 issue is **Susumu Higuchi**.

## Editorial

- 423 Toward the inclusion of gaming disorder in ICD-11  
*Susumu Higuchi*

## Review Article

- 425 Cross-sectional and longitudinal epidemiological studies of Internet gaming disorder:  
A systematic review of the literature  
*Satoko Mihara, and Susumu Higuchi*
- 445 Internet Gaming Disorder as a formative construct: Implications for conceptualization  
and measurement  
*Antonius J van Rooij, Jan Van Looy, and Joël Billieux*
- 459 Conceptualizing Internet use disorders: Addiction or coping process?  
*Daniel Kardefelt-Winther*
- 467 Neurobiological findings related to Internet use disorders  
*Byeongsu Park, Doug Hyun Han, and Sungwon Roh*
- 479 Typology of Internet gaming disorder and its clinical implications  
*Seung-Yup Lee, Hae Kook Lee, and Hyekyung Choo*
- 492 Treatment and risk factors of Internet use disorders  
*Hideki Nakayama, Satoko Mihara, and Susumu Higuchi*
- 506 Retraction

Visit

[www.wileyonlinelibrary.com/journal/pcn](http://www.wileyonlinelibrary.com/journal/pcn)

# Quality Books from RCPsych Publications

## Modern Management of Perinatal Psychiatric Disorders (2nd edn)

Carol Henshaw, John Cox and Joanne Barton

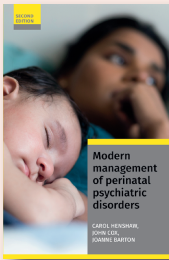

The management of mental health problems is a core component of maternity care. Pregnancy and childbirth may be accompanied by recurrence of pre-existing psychiatric problems, and conditions such as postnatal depression and puerperal psychosis may arise following delivery. Correct management of these problems is essential for both the mother and the developing infant.

This book provides a comprehensive overview of mental health problems associated with pregnancy and the year after delivery. The second edition has been updated to reflect current practice, recent evidence and new clinical guidelines.

Key topics covered include: issues for children and families; screening for and prevention of mental disorders in relation to childbirth; prescribing and physical treatments in pregnancy and lactation; transcultural issues; and diagnosis and management.

**Relevant for:** all psychiatrists and other healthcare professionals who work with pregnant women or new mothers.

April 2017, paperback, 320 pages, ISBN: 978-1-909726-77-2, price \$70

## Management for Psychiatrists (4th edn)

Edited by Dinesh Bhugra, Stuart Bell and Alistair Burns

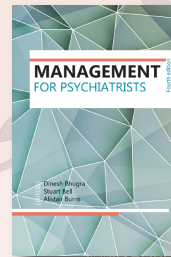

This is a practical guide to the complex world of management in psychiatric practice and covers the various skills necessary for running services. It begins with a theoretical overview of the management, structure, funding and politics of the NHS, it then examines issues of change and conflict such as: medical leadership; team-working; revalidation; quality improvement and governance; clinical audit, confidentiality; service users' expectations; and mental health tribunals.

A section on personal development skills covers: managing committees; presentation skills and time management; developing leadership skills; mental health informatics; and working with the media. All chapters have been completely updated for the fourth edition.

**Relevant for:** advanced trainees and new consultants.

Sep 2016, paperback, 544 pages, ISBN 978-1-909726-65-9, price \$90

## Spirituality and Narrative in Psychiatric Practice

### Stories of Mind and Soul

Edited by Christopher C.H. Cook, Andrew Powell and Andrew Sims

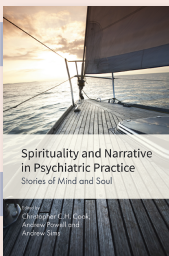

For mental health service users, spirituality and faith are closely connected with questions of relationship, transcendence, and finding meaning and purpose in life – questions best approached by way of narrative (or story). This book breaks new ground

by using narrative to explore the importance and challenge of spirituality in clinical psychiatric practice by including narrative excerpts and case illustrations to show how spiritual concerns can be included in a range of psychiatric treatment options. It also explores the ethical and professional dilemmas spirituality still raises in mental healthcare.

**Relevant for:** all mental health professionals.

March 2016, paperback, 204 pages, ISBN 978-1-909726-45-1, price \$60

## The Drug Conversation

### How to Talk to Your Child About Drugs

Owen Bowden-Jones

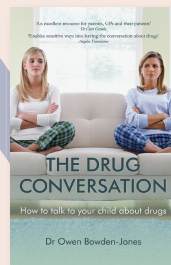

This guide for parents is about how to raise the thorny issue of drugs with their children. It provides information on the different types of drugs available, their attractions and harms, how they work in the brain, and who uses them and why. It covers

issues such as how to detect drug use, drug testing, synthetic drugs ('legal highs'), accessing help, effective treatments and it gives practical advice on how to prepare for and have a conversation about drugs with your child – including examples of actual conversations.

**Relevant for:** all parents will need this book at some stage.

May 2016, paperback, 180 pages, ISBN 978-1-909726-57-4, price \$25.98

## Clinical Topics in Disorders of Intellectual Development

Edited by Marc Woodbury-Smith

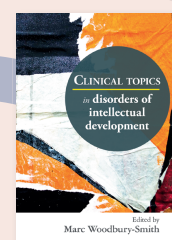

This comprehensive work addresses the care and treatment of adults and children who have intellectual disabilities. It focuses specifically on the interface between intellectual

disabilities and genetics, ageing, epilepsy and forensic psychiatry, with a whole section on the diagnosis, assessment and treatment of autism spectrum disorders.

**Relevant for:** all mental health professionals working with children and adults who have developmental disabilities.

Oct 2015, paperback, 328 pages, ISBN 978-1-909726-39-0, price \$60

RCPsych Publications titles can be bought within North America from:

Publishers Storage and Shipping Company, 46 Development Road, Fitchburg, MA 01420.

Tel: 978 829 2560. Fax: 978 348 1233. Email: orders@pssc.com

Many titles can also be ordered through [www.amazon.com](http://www.amazon.com) and [www.barnesandnoble.com](http://www.barnesandnoble.com)

(RCPsych Publications is the name given to books published by the Royal College of Psychiatrists in the United Kingdom. For our full list of over 130 titles see: [www.rcpsych.ac.uk/books](http://www.rcpsych.ac.uk/books))

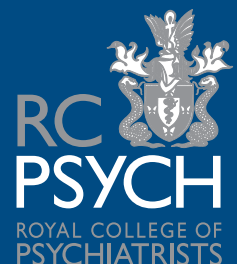

## Subscription and Business Information

*The American Journal of Psychiatry*, ISSN 0002-953X, is published monthly by the American Psychiatric Association.

The American Psychiatric Association does not hold itself responsible for statements made in its publications by contributors or advertisers. Unless so stated, material in *The American Journal of Psychiatry* does not reflect the endorsement, official attitude, or position of the American Psychiatric Association or of the Journal's Editorial Board.

Periodicals postage paid at Arlington, VA, and additional mailing offices. POSTMASTER: Send address changes to *The American Journal of Psychiatry*, Circulation Department, American Psychiatric Association, 1000 Wilson Blvd., Suite 1825, Arlington, VA 22209-3901.

### Editorial Office

*American Journal of Psychiatry*  
American Psychiatric Association  
1000 Wilson Blvd., Suite 1825  
Arlington, VA 22209-3901  
Phone: (703) 907-7885, (703) 907-7889  
E-mail: [ajp@psych.org](mailto:ajp@psych.org)

### Customer Service

Phone: (800) 368-5777 (toll-free)  
E-mail: [appi@psych.org](mailto:appi@psych.org)

### APA Member Subscription Services

Phone: (888) 35-PSYCH (toll-free)

### Subscriptions

Per year: individual \$318.00,  
international \$478.00

Institutional subscriptions are tier priced. For institutional site license or pricing information, contact (703) 907-8538 or [institutions@psych.org](mailto:institutions@psych.org).

*Additional subscription options, including single issues and student rates*

Contact Customer Service

### Advertising

*Pharmaceutical Print and Online Advertising*  
Frank Cox, Kathleen Harrison, Tim Wolfinger  
Pharmaceutical Media, Inc.  
30 East 33rd Street  
New York, NY 10016  
Phone: (212) 904-0379  
E-mail: [twolfinger@pminy.com](mailto:twolfinger@pminy.com)

*Nonpharmaceutical and Online Sales*

Eamon Wood  
Pharmaceutical Media, Inc.  
E-mail: [ewood@pminy.com](mailto:ewood@pminy.com)  
(see address and phone above).

### Permissions and Reprints

Material published in the journals of the American Psychiatric Association and American Psychiatric Association Publishing is protected by copyright and all rights are reserved. Material may not be reproduced in any form or by any means without written permission from the copyright owner. For permission to reproduce material published by APA, please visit [http://www.appi.org/Customer\\_Service/Pages/Permissions.aspx](http://www.appi.org/Customer_Service/Pages/Permissions.aspx) for more information. Permission can also be secured through the Copyright Clearance Center ([www.copyright.com](http://www.copyright.com)).

APA does not require that permission be obtained for the photocopying of isolated articles for nonprofit classroom or library reserve use; all fees associated with such permission are waived. This consent does not extend to other kinds of copying, such as copying for general distribution, for advertising or promotional purposes, for creating new collective works, or for resale. Requests for commercial distribution should be directed to (703) 907-7889.

For bulk reprints, please contact Jane Cha, (703) 907-7889; email: [jcha@psych.org](mailto:jcha@psych.org).

Indexed in Abstracts for Social Workers, Academic Abstracts, Biological Abstracts, Chemical Abstracts, Chicago Psychoanalytic Literature Index, Cumulative Index to Nursing Literature, Excerpta Medica, Hospital Literature Index, Index Medicus, International Nursing Index, Nutrition Abstracts, Psychological Abstracts, Science Citation Index, Social Science Source, and Social Sciences Index.

Pages are produced by Sheridan Journal Services (Waterbury, VT) and printed by Sheridan NH (Hanover, NH) on acid-free paper effective with Volume 169, Number 1, January 2012.

© 2017 American Psychiatric Association.

# Psychiatrist Opportunities

## Philadelphia, PA

Einstein Behavioral Health is a comprehensive treatment facility in Philadelphia, Pennsylvania. We are seeking:

- Medical Director, Behavioral Health Service
- FT Psychiatrist for General Adult Inpatient Psychiatry Unit
- Geropsychiatrist

Our programs offer a full range of adult inpatient mental health services, including an alcohol and chemical dependency treatment unit and a geriatric diagnostic center. Our full continuum of care also includes intensive outpatient programs, partial hospitalization programs and an outpatient medication management clinic.

This opportunity includes an innovative, competitive compensation model and an excellent working environment as a member of a large, experienced behavioral medicine team.

Einstein Behavioral Health offers programs to address behavioral health issues for all ages. Our 36-bed Long Term Structured Residence (LTSR) services both adults and older adults, and our Adult Crisis Response Center (CRC) is a crisis/emergency psychiatry facility. Our Child and Adolescent Crisis Response Center includes a full range of services for children and adolescents.

We are part of Einstein Healthcare Network, a large, comprehensive healthcare network, and have a long history of providing excellent patient care and a high level of physician satisfaction.

For more information, please contact  
**Kim Hannan, Physician Recruiter,**  
HannanKi@einstein.edu or call  
267-421-7435.

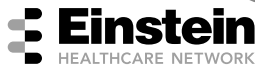

EOE

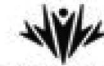

## Intermountain<sup>®</sup> Healthcare

*Helping People Live the Healthiest Lives Possible.*

Psychiatrists (adult and child) &  
Emergency-Access Center  
are currently needed in:  
**Logan • Ogden • Park City  
Salt Lake City • St. George**

Employment with Intermountain Medical Group.  
Competitive salary with transition to production and  
additional income for meeting quality goals. Stipend  
available. Signing bonus and loan repayment  
available. Full Intermountain benefits to include  
defined pension, 401k match & CME.  
Relocation provided up to 15K.

For the second year in a row, Forbes magazine has  
named Intermountain one of the top 3 healthcare  
organizations, a top 25 employer overall

Contact Intermountain Physician Recruiting.  
800-888-3134 **PhysicianRecruit@imail.org**  
<http://physicianjobsintermountain.org>

## Inpatient and Outpatient Psychiatrist Opportunities

*Are you ready  
to achieve a higher state of caring?*

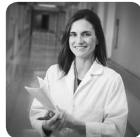

Baystate Health, home of the University of Massachusetts Medical School-Baystate, is searching for ABMS BC/BE Psychiatrists to join our Department of Psychiatry at Baystate Noble Hospital in Westfield, Massachusetts.

These opportunities feature flexible scheduling, compensated call, a future appointment to the University of Massachusetts Medical School-Baystate, mentoring opportunities, and a robust benefits package.

Baystate Noble Hospital is a 97-bed acute care community hospital featuring world-class technology, diagnostics, and Baystate Health specialists. An ideal combination of "high tech" and "high touch," a staff of highly trained and compassionate nurses and medical support personnel complements an outstanding medical staff.

At Baystate Health, you'll experience a deeper sense of compassion, greater breadth of diversity, and a never-ending desire to raise the standard of medical excellence — regionally and nationally.

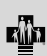

**Baystate  
Health**

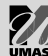

University of  
Massachusetts  
UMASS Medical School

To apply or to learn more, please visit our website at  
[www.choosebaystatehealth.org/noble/ajp](http://www.choosebaystatehealth.org/noble/ajp)

Or contact Barry Sarvet, MD, Chair, Department of Psychiatry,  
c/o Elizabeth Fox, Physician Recruiter.  
413-794-7726 | [Elizabeth.Fox@baystatehealth.org](mailto:Elizabeth.Fox@baystatehealth.org)

*Together we deliver a higher state of caring.®*

Baystate Health is an Equal Opportunity employer. All qualified applicants will receive consideration for employment without regard to race, color, religion, sex, sexual orientation, gender identity, marital status, national origin, ancestry, age, genetic information, disability, or protected veteran status.

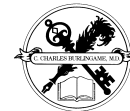

We are pleased to announce that  
**HAROLD ALAN PINCUS, M.D.**  
is the 2017 recipient of the  
**C. CHARLES BURLINGAME, M.D. AWARD**  
for his outstanding contributions to psychiatry.

### **Past Recipients**

- 1988 Robert Kellner, M.D., Ph.D.
- 1989 William T. Carpenter, Jr., M.D.
- 1990 Dennis P. Cantwell, M.D.
- 1991 George E. Vaillant, M.D.
- 1992 A. John Rush, M.D.
- 1993 John C. Nemiah, M.D.
- 1994 Maurice J. Martin, M.D.
- 1995 Otto F. Kernberg, M.D.
- 1996 Charles P. O'Brien, M.D., Ph.D.
- 1997 Glen Owen Gabbard, M.D.
- 1998 Lissy F. Jarvik, M.D., Ph.D.
- 1999 Nancy C. Andreasen, M.D., Ph.D.
- 2000 Lewis L. Judd, M.D.
- 2001 Paul S. Appelbaum, M.D.
- 2002 Charles B. Nemeroff, M.D., Ph.D.
- 2003 Dilip V. Jeste, M.D.
- 2004 David H. Barlow, Ph.D.
- 2005 Herbert D. Kleber, M.D.
- 2006 Daniel N. Stern, M.D.
- 2007 Jerrold F. Rosenbaum, M.D.
- 2008 K. Ranga Rama Krishnan, M.D.
- 2009 David J. Kupfer, M.D.
- 2010 Professor Sir Michael Rutter
- 2011 Jeffrey A. Lieberman, M.D.
- 2012 Judith L. Rapoport, M.D.
- 2013 Nora D. Volkow, M.D.
- 2014 Daniel R. Weinberger, M.D.
- 2015 David A. Brent, M.D.
- 2016 Steven S. Sharfstein, M.D.

**Institute  
of Living**

A Division of Hartford Hospital

200 Retreat Avenue  
Hartford, CT 06106  
1-800-673-2411

# Understanding Mental Disorders

## Your Guide to DSM-5®

American Psychiatric Association

**A consumer guide for anyone who has  
been touched by mental illness!**

*With Foreword by Patrick J. Kennedy*

Most of us know someone who suffers from a mental illness. This book helps those who may be struggling with mental health problems, as well as those who want to help others achieve mental health and well-being.

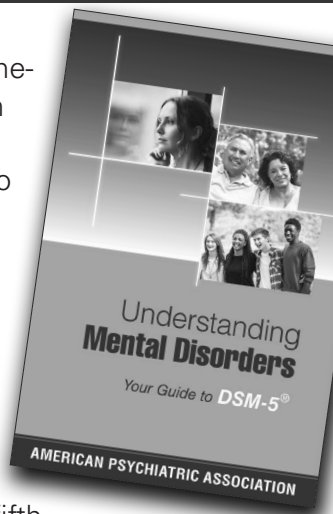

Based on the latest, fifth edition of the *Diagnostic and Statistical Manual of Mental Disorders*—known as DSM-5®—**Understanding Mental Disorders** provides valuable insight on what to expect from an illness and its treatment—and will help readers recognize symptoms, know when to seek help, and get the right care. Featured disorders include depression, schizophrenia, ADHD, autism spectrum disorder, posttraumatic stress disorder, and bipolar disorder, among others.

**2015 • 388 pages • ISBN 978-1-58562-491-1  
Paperback • \$24.95 • Item #62491**

AMERICAN  
PSYCHIATRIC  
ASSOCIATION  
PUBLISHING

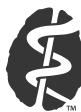

**www.appi.org**  
Phone: 703-907-7322  
Toll Free: 1-800-368-5777  
Email: [appi@psych.org](mailto:appi@psych.org)

**20% Discount • American Psychiatric Association Members  
25% Discount • APA Resident-Fellow Members**

AH1718

## Outpatient Adult Psychiatrists

### Minnesota

*Share your expertise in an environment that supports new treatments and innovation while embracing a strong work-life balance.*

HealthPartners is a dynamic multi-specialty medical group practice headquartered in the Twin Cities of Minneapolis/St. Paul, Minnesota. Our Behavioral Health group has a large outpatient practice with 21 adult psychiatrists, 4 child psychiatrists, 7 clinical nurse specialists and 60 therapists. Each has special interests and expertise, but also practice as generalists to provide outstanding clinical care to our diverse patient population via **integrated outpatient services** with our primary care and specialty clinics.

We have exciting practice opportunities for outpatient adult psychiatrists, and provide:

- Full-time and part-time practices
- Competitive pay
- A generous benefits package, including relocation assistance, employer-matched 401(k) and 457(b), malpractice coverage, and competitive PTO and CME
- Minimal call requirements (by pager/phone) covering outpatient practice
- Affiliation with multiple hospitals and clinics including inpatient psychiatry, intensive day programs, chemical dependency programs, and eating disorder programs
- A large internal referral base
- Exceptional nursing support and psychotherapy colleagues
- An organizational commitment to a sustainable medical practice with EHR, documentation efficiency work group, extensive billing and coding support, integrated services and telemedicine

HealthPartners' integrated health care system is recognized locally and nationally for great care and leadership. We believe outstanding health care is delivered when we merge the science of medicine with the compassion, spirit and humanity of our hearts. We refer to this as "**Head + Heart, Together,**" which exists to inspire constant improvement and lasting success. We achieve this by partnering with patients and families in everything from care decisions to service and facility design. As we work together as a unified team, we engage patients, families and the community, and put them at the center of everything we do.

To learn more and apply, visit us online at [healthpartners.com/careers](http://healthpartners.com/careers), or email your CV and cover letter to [lori.m.fake@healthpartners.com](mailto:lori.m.fake@healthpartners.com).

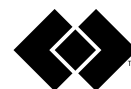

**HealthPartners®**

We are an equal opportunity employer and all qualified applicants will receive consideration for employment without regard to race, color, religion, sex, national origin, disability status, protected veteran status, or any other characteristic protected by law.

[healthpartners.com](http://healthpartners.com)

# We've got you covered.

For over 30 years, we have provided psychiatrists with exceptional protection and personalized service. We offer comprehensive insurance coverage and superior risk management support through an "A" rated carrier.

## ANNOUNCING NEW ENHANCEMENTS TO THE AMERICAN PSYCHIATRIC ASSOCIATION PSYCHIATRISTS' PROFESSIONAL LIABILITY PROGRAM:

- **Defense Expenses related to Licensing Board Hearings and Other Proceedings:** Increased Limit to \$50,000 per proceeding with NO annual aggregate (higher limits are available up to \$150,000)
- **Fire Legal Liability Coverage:** Limit of liability increased to \$150,000 for fire damage to third party property
- **Emergency Aid Coverage:** Reimbursement up to \$15,000 in costs and expenses for medical supplies
- Insured's **Consent to Settle** is now required in the settlement of any claim – No arbitration clause!
- **First Party Assault and Battery Coverage:** Up to \$25,000 reimbursement for medical expenses related to injuries and/or personal property damage caused by a patient or client
- **Medical Payments Coverage:** Increased limit to \$100,000 for Medical Payments to a patient or client arising from bodily injury on your business premises

## IN ADDITION WE CONTINUE TO OFFER THE FOLLOWING MULTIPLE PREMIUM DISCOUNTS:

- **50% Resident-Fellow Member Discount**
- **Up to 50% New Doctor Discount** (for those who qualify)
- **50% Part Time Discount** for up to 20 client hours a week or less
- **10% New Policyholder Discount** (must be claims free for the last 6 months)
- **15% Child and Adolescent Psychiatrist Discount** for those whose patient base is more than 50% Children and Adolescents
- **10% Claims Free Discount** for those practicing 10 years, after completion of training, and remain claims free
- **5% Risk Management Discount** for 3 hours of CME

*(Above Coverage Features and Discounts are subject to individual state approval)*

Visit us at [apamalpractice.com](http://apamalpractice.com) or call **877.740.1777** to learn more.

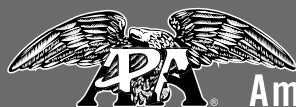

**American Professional Agency**

LEADERS IN PSYCHIATRIC MEDICAL LIABILITY INSURANCE

ENDORSED BY THE  
AMERICAN PSYCHIATRIC  
ASSOCIATION
